# Supplementary material
Source: publisher site journal article supplement (https://static.cambridge.org/content/id/urn:cambridge.org:id:article:S2040174419000801/resource/name/S2040174419000801supp004.docx)
Supplement: Supplementary file 1 [file S2040174419000801supp004.docx]

**Supplementary Table 2.** Correlation estimates between maternal/offspring factors and placental age acceleration

| **Maternal and offspring factors** | **Female  offspring** | | **Male  offspring** | | **Combined** | |
| --- | --- | --- | --- | --- | --- | --- |
| **Pearson correlation (95% CI)** | **P-value** | **Pearson correlation (95% CI)** | **P-value** | **Pearson correlation (95% CI)** | **P-value** |
| Maternal age | 0.12 (-0.04, 0.28) | 0.14 | 0.14 (-0.02, 0.29) | 0.09 | **0.13 (0.02, 0.24)** | **0.03** |
| 1st trimester systolic blood pressure | 0.09 (-0.08, 0.26) | 0.31 | **-0.28 (-0.43, -0.12)** | **0.001** | -0.08 (-0.20, 0.04) | 0.24 |
| 1st trimester diastolic blood pressure | 0.09 (-0.08, 0.26) | 0.31 | **-0.20 (-0.36, -0.04)** | **0.01** | -0.04 (-0.16, 0.08) | 0.27 |
| 2nd trimester systolic blood pressure | 0.07 (-0.09, 0.23) | 0.58 | **-0.23 (-0.38, -0.06)** | **0.01** | -0.05 (-0.17, 0.07) | 0.22 |
| 2nd trimester diastolic blood pressure | 0.03 (-0.13, 0.19) | 0.51 | -0.15 (-0.31, 0.01) | 0.21 | -0.05 (-0.17, 0.07) | 0.22 |
| 3rd trimester systolic blood pressure | -0.01 (-0.17, 0.16) | 0.45 | **-0.25 (-0.40, -0.09)** | **0.001** | **-0.12 (-0.23, 0.00)** | **0.04** |
| 3rd trimester diastolic blood pressure | -0.02 (-0.19, 0.14) | 0.44 | **-0.27 (-0.41, -0.11)** | **0.001** | **-0.13 (-0.24, -0.01)** | **0.01** |
| pre-pregnancy BMI | 0.03 (-0.14, 0.19) | 0.74 | **-0.19 (-0.34, -0.03)** | **0.02** | -0.08 (-0.19, 0.04) | 0.18 |
| 1st Trimester Gestational Weight Gain | -0.08 (-0.23, 0.08) | 0.34 | **-0.17 (-0.32, -0.01)** | **0.04** | -0.11 (-0.22, -0.002) | 0.05 |
| 2nd Trimester Gestational Weight Gain | -0.12 (-0.27, 0.04) | 0.15 | **-0.21 (-0.36, -0.05)** | **0.01** | **-0.16 (-0.27, -0.05)** | **0.004** |
| 3rd Trimester Gestational Weight Gain | **-0.17 (-0.32, -0.01)** | **0.04** | **-0.18 (-0.33, -0.02)** | **0.03** | **-0.17 (-0.28, -0.06)** | **0.003** |
